# Supplementary material for: Potent Tetrahydroquinolone Eliminates Apicomplexan Parasites
Source: Front Cell Infect Microbiol. 2020 Jun 9;10:203. doi: 10.3389/fcimb.2020.00203 (PMC7311950; doi:10.3389/fcimb.2020.00203)
Supplement: Supplementary file 2 [file Data_Sheet_2.xlsx]

## Sheet: Tgondii_mRNA_NSC
Supplementary Table 2: NSC infections with T. gondii ∆RPS13 (-Tet/+Tet)
Differentially expressed genes with a FDR <= 0.05
Downregulated in T. gondii ∆RPS13 without Tetracycline
Upregulated in T. gondii ∆RPS13 without Tetracycline
ID	baseMean	log2 Fold Change	pvalue	FDR	Description
TGME49_263090	757.877	-0.529188	0.000214338	0.00413737	14-3-3 protein
TGME49_220400	373.751	-0.956996	0.000990095	0.0121614	actin depolymerizing factor ADF
TGME49_239530	47.8947	-0.521762	0.0063106	0.0442724	alanine-glyoxylate aminotransferase
TGME49_217890	165.916	-0.548032	0.00142614	0.0160511	alkyl hydroperoxide reductase/ Thiol specific antioxidant/ Mal allergen, putative
TGME49_314820	38.2789	-0.69141	0.00525076	0.0390039	atp synthase F1, epsilon subunit, putative
TGME49_254120	126.594	-0.686238	0.00273948	0.0248785	autophagy-related protein 8 atg8, putative
TGME49_249180	410.256	-0.869878	0.00165729	0.0176164	bifunctional dihydrofolate reductase-thymidylate synthase
TGME49_266860	65.4222	-1.5224	4.12006e-13	1.44523e-10	BTB/POZ domain-containing protein
TGME49_229480	485.463	-0.399172	0.00459859	0.035758	calcium binding protein precursor, putative
TGME49_249240	226.275	-1.00513	1.36291e-05	0.000448198	calmodulin, putative
TGME49_305050	55.233	-0.841028	0.00284715	0.0255717	calmodulin, putative
TGME49_269442	39.9616	-0.812015	0.00114309	0.0135667	calmodulin, putative
TGME49_242070	198.255	-0.445021	0.00409155	0.0329177	cAMP-dependent protein kinase regulatory subunit
TGME49_266910	12.4188	-0.936193	0.0010065	0.0122921	cell-cycle-associated protein kinase GSK, putative
TGME49_247230	50.4942	-0.627691	0.00400597	0.0325112	centrin
TGME49_262640	80.3383	-0.489973	0.0062369	0.0438528	Cg8 family protein
TGME49_310030	89.087	-0.676683	0.00132031	0.0150749	cyclase-associated protein, putative
TGME49_221210	341.696	-0.528019	0.00276514	0.0249538	cyclophilin
TGME49_288650	1384.36	-0.630109	0.000174352	0.00350592	dense granule protein GRA12
TGME49_239740	193.058	-0.752233	4.54507e-07	2.60887e-05	dense granule protein GRA14
TGME49_227620	2371.8	-0.965345	5.11006e-06	0.000204209	dense granule protein GRA2
TGME49_227280	3223.33	-0.706474	0.000482671	0.00735319	dense granule protein GRA3
TGME49_310780	607.975	-0.444145	0.00256955	0.023789	dense granule protein GRA4
TGME49_286450	3295.19	-0.589503	0.00159633	0.0172283	dense granule protein GRA5
TGME49_275440	1999.62	-0.629986	2.46137e-05	0.000722841	dense granule protein GRA6
TGME49_203310	1098.33	-1.15554	0.000542546	0.00796124	dense granule protein GRA7
TGME49_233140	88.2574	-0.837351	0.000937514	0.0118153	deoxyuridine 5'-triphosphate nucleotidohydrolase, putative
TGME49_221590	119.892	-0.518139	0.000686413	0.0094523	dual specificity phosphatase, catalytic domain-containing protein
TGME49_223000	44.9426	-0.552126	0.0067453	0.0464871	dynein light chain DLC
TGME49_226040	36.2737	-0.711959	0.00666989	0.0461773	EF hand domain-containing protein
TGME49_219140	86.6437	-0.514884	0.00648118	0.0452003	EF-1 guanine nucleotide exchange domain-containing protein
TGME49_286420	1014.69	-0.433963	0.00407427	0.0329177	elongation factor 1-alpha (EF-1-ALPHA), putative
TGME49_249030	75.4702	-0.583631	0.00123713	0.0143853	endonuclease/exonuclease/phosphatase family protein
TGME49_289690	660.089	-0.530437	0.00289335	0.0257661	glyceraldehyde-3-phosphate dehydrogenase GAPDH1
TGME49_223110	73.5881	-0.487722	0.00309568	0.0270348	glycolipid transfer protein GLTP
TGME49_232940	254.21	-1.11221	4.74127e-05	0.00124217	heat shock protein HSP20
TGME49_312600	77.6459	-0.653641	0.00318223	0.0277139	heat shock protein HSP21
TGME49_289600	76.7786	-1.03291	0.000181509	0.00362674	heat shock protein HSP29
TGME49_273760	1303.7	-0.509085	0.00733501	0.0494799	heat shock protein HSP70
TGME49_270580	16.0349	-2.92519	2.6473e-05	0.00077028	HECT-domain (ubiquitin-transferase) domain-containing protein
TGME49_227970	117.537	-0.577727	0.000985356	0.0121614	histone family DNA-binding protein
TGME49_300200	486.127	-0.807717	0.000476124	0.00729672	histone H2AZ
TGME49_209910	458.431	-0.72879	0.000341662	0.0058147	histone H2Bv
TGME49_218260	328.42	-0.728832	4.90329e-06	0.000199738	histone H3.3
TGME49_210408	757.597	-0.646177	0.00127614	0.0146558	HMG (high mobility group) box domain-containing protein
TGME49_297488	2.97312	-2.70892	4.26508e-06	0.000179532	hypothetical protein
TGME49_297495	19.2968	-2.45568	7.18919e-08	5.67407e-06	hypothetical protein
TGME49_297492	8.26783	-2.42884	1.32884e-06	6.45409e-05	hypothetical protein
TGME49_244260	13.3416	-1.98849	4.5027e-11	8.61517e-09	hypothetical protein
TGME49_217420	17.217	-1.95363	7.50412e-06	0.000283719	hypothetical protein
TGME49_286460	2.77256	-1.78059	0.00548224	0.0402498	hypothetical protein
TGME49_252260	10.4392	-1.38448	0.000714392	0.00967955	hypothetical protein
TGME49_214575	28.6588	-1.37039	5.84541e-09	6.4361e-07	hypothetical protein
TGME49_215960	239.315	-1.32888	1.1636e-10	2.04083e-08	hypothetical protein
TGME49_230160	268.127	-1.26057	3.34841e-05	0.000927275	hypothetical protein
TGME49_269417	11.1812	-1.25824	0.000195025	0.00384808	hypothetical protein
TGME49_201785	152.362	-1.18122	0.000915462	0.0116069	hypothetical protein
TGME49_232030	85.5146	-1.01246	7.51177e-05	0.00178979	hypothetical protein
TGME49_253820	112.933	-1.00726	0.00021833	0.00416475	hypothetical protein
TGME49_294790	140.311	-0.973781	0.00259784	0.0239107	hypothetical protein
TGME49_207400	140.967	-0.967499	5.56724e-07	3.16681e-05	hypothetical protein
TGME49_315900	8.34418	-0.96006	0.00396998	0.0323022	hypothetical protein
TGME49_215530	225.284	-0.954415	0.000411793	0.00661594	hypothetical protein
TGME49_247530	97.2279	-0.938499	0.00021304	0.00413737	hypothetical protein
TGME49_312140	119.931	-0.9298	6.4599e-05	0.00158708	hypothetical protein
TGME49_283540	61.3234	-0.916235	0.00112731	0.013532	hypothetical protein
TGME49_250100	46.3517	-0.901884	9.20243e-05	0.00211288	hypothetical protein
TGME49_257380	104.431	-0.891388	1.35727e-05	0.000448198	hypothetical protein
TGME49_232550	64.1065	-0.879548	5.58014e-05	0.00142068	hypothetical protein
TGME49_212270	141.419	-0.860507	0.00164426	0.017537	hypothetical protein
TGME49_314260	143.324	-0.85403	0.000120702	0.00261894	hypothetical protein
TGME49_226500	44.3942	-0.849907	7.40938e-05	0.00177208	hypothetical protein
TGME49_234380	192.74	-0.847707	8.92336e-07	4.81556e-05	hypothetical protein
TGME49_219500	40.1128	-0.832042	0.0011653	0.0138044	hypothetical protein
TGME49_200360	524.743	-0.825827	2.85168e-05	0.000820862	hypothetical protein
TGME49_289920	99.6741	-0.818492	0.000733599	0.0098552	hypothetical protein
TGME49_223010	56.8489	-0.816574	0.000729215	0.00981719	hypothetical protein
TGME49_278600	254.323	-0.814921	0.00642939	0.0450058	hypothetical protein
TGME49_248445	49.0379	-0.814416	0.00153185	0.0168035	hypothetical protein
TGME49_273320	54.9774	-0.808972	0.00364167	0.0305359	hypothetical protein
TGME49_253690	137.493	-0.800864	0.000814395	0.0106431	hypothetical protein
TGME49_316710	41.1815	-0.793254	0.00224421	0.0215213	hypothetical protein
TGME49_273310	42.9444	-0.773119	0.00285718	0.025589	hypothetical protein
TGME49_311010	73.3734	-0.769772	5.12934e-05	0.00132732	hypothetical protein
TGME49_294990	68.1909	-0.765037	0.000535573	0.00791945	hypothetical protein
TGME49_213050	155.173	-0.762975	0.00012952	0.00275835	hypothetical protein
TGME49_268980	169.262	-0.762517	1.78121e-05	0.00055676	hypothetical protein
TGME49_316255	47.5467	-0.761768	0.000318306	0.00550625	hypothetical protein
TGME49_237230	185.863	-0.7613	1.04603e-05	0.000368973	hypothetical protein
TGME49_230705	29.5883	-0.749789	0.00142904	0.016055	hypothetical protein
TGME49_201390	759.318	-0.741408	0.00252251	0.0234567	hypothetical protein
TGME49_270700	46.9771	-0.740392	0.00387381	0.0318479	hypothetical protein
TGME49_224620	14.2882	-0.739512	0.00619813	0.0437263	hypothetical protein
TGME49_209095	29.4675	-0.711914	0.00238199	0.0224811	hypothetical protein
TGME49_293430	189.157	-0.703179	0.00657828	0.0457437	hypothetical protein
TGME49_268760	148.849	-0.698065	0.006608	0.0458998	hypothetical protein
TGME49_253710	34.9428	-0.695276	0.000573454	0.00826664	hypothetical protein
TGME49_225555	122.237	-0.689993	0.000615216	0.00863217	hypothetical protein
TGME49_286770	27.8835	-0.682849	0.00725447	0.0491467	hypothetical protein
TGME49_295360	105.657	-0.673677	0.000842851	0.0108721	hypothetical protein
TGME49_312940	128.733	-0.667931	0.00159895	0.0172283	hypothetical protein
TGME49_206340	98.1378	-0.663512	0.000346066	0.00585177	hypothetical protein
TGME49_259630	138.552	-0.660101	0.00612141	0.0434276	hypothetical protein
TGME49_230180	242.899	-0.659493	2.19973e-05	0.00065825	hypothetical protein
TGME49_288030	39.7579	-0.654309	0.00483445	0.0369996	hypothetical protein
TGME49_210810	54.7024	-0.649306	0.00104505	0.0126893	hypothetical protein
TGME49_263630	67.1378	-0.646786	0.00695865	0.0474993	hypothetical protein
TGME49_225160	60.8733	-0.645819	0.000254884	0.00462453	hypothetical protein
TGME49_211030	152.83	-0.645413	0.00197497	0.0198251	hypothetical protein
TGME49_258820	106.099	-0.642571	0.00191206	0.0193784	hypothetical protein
TGME49_219690	140.528	-0.642336	0.00122739	0.0142984	hypothetical protein
TGME49_275460	20.4118	-0.638839	0.00620887	0.043748	hypothetical protein
TGME49_309770	44.4715	-0.632661	0.000991944	0.0121614	hypothetical protein
TGME49_249300	131.293	-0.628174	0.000499249	0.00745215	hypothetical protein
TGME49_203060	34.1859	-0.618133	0.00490347	0.0372122	hypothetical protein
TGME49_227030	84.1946	-0.603913	0.006131	0.0434468	hypothetical protein
TGME49_250115	69.43	-0.595349	0.00308681	0.026995	hypothetical protein
TGME49_299780	155.14	-0.594771	8.47842e-05	0.00198269	hypothetical protein
TGME49_244280	193.982	-0.593349	0.00216403	0.0210211	hypothetical protein
TGME49_258730	49.0337	-0.592269	0.00483314	0.0369996	hypothetical protein
TGME49_219810	159.765	-0.588428	0.000769953	0.0102132	hypothetical protein
TGME49_213590	42.5701	-0.584074	0.0020254	0.0201391	hypothetical protein
TGME49_217555	86.6233	-0.579783	0.00142521	0.0160511	hypothetical protein
TGME49_217550	72.0281	-0.576152	0.00213636	0.0208485	hypothetical protein
TGME49_215220	293.938	-0.570155	0.000246883	0.00455795	hypothetical protein
TGME49_272660	103.077	-0.564178	0.000407486	0.00660059	hypothetical protein
TGME49_227330	63.9314	-0.563498	0.00170802	0.0180041	hypothetical protein
TGME49_265370	108.508	-0.554089	0.00295291	0.0261347	hypothetical protein
TGME49_258470	526.2	-0.553133	0.0012558	0.0145222	hypothetical protein
TGME49_299980	51.9333	-0.550582	0.00551873	0.0404289	hypothetical protein
TGME49_216180	185.65	-0.548964	0.001497	0.0165659	hypothetical protein
TGME49_238150	54.6426	-0.546557	0.00441423	0.0348337	hypothetical protein
TGME49_211630	151.486	-0.54461	0.00516846	0.0385285	hypothetical protein
TGME49_226570	292.796	-0.539709	0.00295951	0.0261347	hypothetical protein
TGME49_245432	94.0951	-0.537911	0.00161182	0.0172855	hypothetical protein
TGME49_278450	75.5613	-0.523888	0.00371402	0.031011	hypothetical protein
TGME49_246940	228.802	-0.520674	0.00529866	0.0392673	hypothetical protein
TGME49_236630	65.8872	-0.517614	0.00363117	0.0304883	hypothetical protein
TGME49_310790	208.53	-0.514616	0.0047577	0.036679	hypothetical protein
TGME49_225540	62.9805	-0.510896	0.0034829	0.0297946	hypothetical protein
TGME49_316250	107.86	-0.509282	0.00219809	0.0211992	hypothetical protein
TGME49_314080	96.2511	-0.502279	0.00731738	0.0494667	hypothetical protein
TGME49_265790	110.485	-0.501694	0.00206684	0.0204546	hypothetical protein
TGME49_275860	253.595	-0.484099	0.000465059	0.00716192	hypothetical protein
TGME49_247770	97.0391	-0.468557	0.00576041	0.041806	hypothetical protein
TGME49_307830	143.204	-0.452219	0.00583728	0.0421218	hypothetical protein
TGME49_313440	141.876	-0.422716	0.00396316	0.0323022	hypothetical protein
TGME49_258870	401.698	-0.400896	0.00664074	0.0460259	hypothetical protein
TGME49_236950	456.627	-0.398761	0.00733131	0.0494799	hypothetical protein
TGME49_260820	98.1489	-0.966378	0.00307616	0.0269762	IMC sub-compartment protein ISP1
TGME49_207665	21.6293	-2.12325	6.90681e-11	1.28263e-08	kinesin motor domain-containing protein
TGME49_232350	444.695	-0.520402	0.00373628	0.0311225	lactate dehydrogenase LDH1
TGME49_229140	88.4915	-0.798607	1.23983e-05	0.000426192	MaoC family domain-containing protein
TGME49_218740	9.1101	-1.03757	0.00471502	0.036403	membrane protein, putative
TGME49_214940	554.98	-1.00633	0.000395538	0.00644591	MIC2-associated protein M2AP
TGME49_291890	549.898	-1.09763	0.00546478	0.0401684	microneme protein MIC1
TGME49_250710	726.242	-1.35753	0.000543836	0.00796124	microneme protein MIC10
TGME49_204530	685.807	-1.18941	0.00015788	0.00320532	microneme protein MIC11
TGME49_319560	471.541	-1.16963	0.00334595	0.0288611	microneme protein MIC3
TGME49_208030	433.998	-0.839492	0.0020794	0.0205467	microneme protein MIC4
TGME49_277080	646.185	-1.20954	0.00289271	0.0257661	microneme protein MIC5
TGME49_218520	411.292	-0.982333	0.000447184	0.00696329	microneme protein MIC6
TGME49_245490	195.383	-0.642716	0.00515626	0.0385237	microneme protein MIC8
TGME49_293480	24.344	-0.99129	0.00122318	0.0142758	MoeA N-terminal region (domain I and II) domain-containing protein
TGME49_240800	58.5962	-0.737169	0.00234994	0.0223457	MORN repeat-containing protein
TGME49_297470	42.4562	-0.680721	0.00370082	0.0309496	myosin light chain 2, putative
TGME49_311260	29.5211	-0.763544	0.00364729	0.0305424	myosin light chain MLC1, putative
TGME49_247220	111.757	-0.671462	0.000789174	0.0104026	nudix -type motif 9 isoform a family protein
TGME49_229930	63.2734	-1.18944	3.87029e-05	0.00105017	p25-alpha family protein
TGME49_285470	82.4708	-0.765381	0.00156196	0.0169901	patched family protein
TGME49_232410	198.365	-1.14962	0.000922769	0.0116761	PDI family protein
TGME49_230410	118.418	-0.824965	6.01307e-06	0.000232924	peroxiredoxin PRX3
TGME49_293510	140.682	-0.491975	0.0038087	0.0315179	poly(ADP-ribose) polymerase and DNA-Ligase Zn-finger region domain-containing protein
TGME49_293690	331.459	-0.772113	0.000837705	0.0108721	profilin PRF
TGME49_208450	78.9754	-1.36939	4.89892e-08	4.23723e-06	protease inhibitor PI2
TGME49_239500	107.281	-0.593663	0.0017516	0.018341	proteasome subunit alpha type, putative
TGME49_249270	179.486	-0.456368	0.00197875	0.0198315	protein disulfide isomerase-related protein (provisional), putative
TGME49_238110	33.2309	-0.733978	0.0018367	0.0187957	replication factor a protein 3 protein
TGME49_266100	50.7824	-0.523102	0.00551944	0.0404289	rhoptry kinase family protein ROP41
TGME49_215775	91.7747	-1.11451	0.000349464	0.00588405	rhoptry protein ROP8
TGME49_243730	501.11	-0.612465	0.000176093	0.00352969	rhoptry protein ROP9
TGME49_270380	392.61	-1.28109	2.18301e-07	1.42098e-05	ribosomal protein RPS13
TGME49_276940	143.921	-0.912312	0.00025098	0.00457945	ribosome associated membrane protein RAMP4, putative
TGME49_320190	35.6572	-0.722156	0.000216239	0.00413737	SAG-related sequence SRS16B
TGME49_319350	96.0099	-0.695521	0.00262459	0.0240683	SAG-related sequence SRS17B
TGME49_301160	16.0919	-1.04506	0.0011837	0.0139438	SAG-related sequence SRS19C
TGME49_301180	26.3902	-1.07302	2.88986e-06	0.00013127	SAG-related sequence SRS19F
TGME49_233460	3466.5	-0.948116	0.000438095	0.00689808	SAG-related sequence SRS29B
TGME49_233480	1170.25	-0.660257	8.82018e-05	0.00203995	SAG-related sequence SRS29C
TGME49_273130	44.2377	-1.48216	2.38037e-05	0.000705617	SAG-related sequence SRS30A
TGME49_273120	16.4873	-1.15672	4.29486e-05	0.00115888	SAG-related sequence SRS30C
TGME49_271050	2910.85	-0.899853	0.000593589	0.00844126	SAG-related sequence SRS34A
TGME49_308840	399.615	-0.886795	0.00348721	0.0297946	SAG-related sequence SRS51
TGME49_315320	232.427	-0.703754	9.99309e-06	0.000356477	SAG-related sequence SRS52A
TGME49_308020	125.123	-0.702137	0.00105564	0.0127882	SAG-related sequence SRS57
TGME49_226860	93.1447	-0.773019	3.66078e-05	0.00100061	SAG-related sequence SRS67
TGME49_246130	100.353	-0.619333	0.00424513	0.0337154	serpin (serine proteinase inhibitor) superfamily protein
TGME49_295450	70.4227	-0.677285	0.00103876	0.0126372	sjoegren syndrome nuclear autoantigen 1 family protein
TGME49_222850	105.358	-0.51425	0.00383043	0.0316148	stress responsive a/b barrel domain-containing protein
TGME49_200350	31.9781	-0.686431	0.00164889	0.0175566	subtilisin SUB3
TGME49_290600	110.107	-0.442695	0.00577917	0.041846	succinyl-CoA-synthetase alpha SCSA
TGME49_316310	300.834	-0.646542	0.00382597	0.0316148	superoxide dismutase
TGME49_216140	64.1808	-1.00289	9.35262e-06	0.000341344	tetratricopeptide repeat-containing protein
TGME49_255480	107.05	-0.705633	4.46364e-05	0.00118918	thioredoxin domain-containing protein
TGME49_293870	332.316	-0.678954	0.000420288	0.00671822	thioredoxin, putative
TGME49_249370	189.913	-0.752541	0.000988836	0.0121614	translation initiation factor SUI1, putative
TGME49_286090	309.569	-0.680531	9.43654e-05	0.00215878	translation initiation factor SUI1, putative
TGME49_295310	17.286	-0.776468	0.00570765	0.0414917	tubulin binding cofactor A protein
TGME49_270595	70.351	-2.66484	1.60756e-09	2.20656e-07	UBA/TS-N domain-containing protein
TGME49_310040	130.702	-0.679628	0.000281652	0.00500943	ubiquitin conjugating enzyme E2, putative
TGME49_248460	42.9702	-0.56655	0.00335438	0.0288943	ubiquitin, putative
TGME49_240630	38.5178	-0.717131	0.000779915	0.0103021	ULK kinase
TGME49_208820	17.5438	1.22714	6.59581e-05	0.00160795	1-deoxy-D-xylulose-5-phosphate synthase
TGME49_278110	32.1593	0.835212	0.000215979	0.00413737	1,3-beta-glucan synthase component protein
TGME49_244200	64.8528	0.631779	0.00441903	0.0348337	2-oxoglutarate dehydrogenase e1 component, mitochondrial precursor, putative
TGME49_457990	23171.5	1.54932	1.92307e-06	8.99425e-05	28S ribosomal RNA
TGME49_293000	53.0436	0.665314	0.000248095	0.00455811	3'5'-cyclic nucleotide phosphodiesterase domain-containing protein
TGME49_202540	118.573	0.686921	0.000410994	0.00661594	3'5'-cyclic nucleotide phosphodiesterase domain-containing protein
TGME49_257080	37.4615	0.689494	0.0018365	0.0187957	3'5'-cyclic nucleotide phosphodiesterase domain-containing protein
TGME49_241880	108.028	1.10957	0.00066438	0.00923986	3'5'-cyclic nucleotide phosphodiesterase domain-containing protein
TGME49_269000	11.2303	0.903839	0.00156647	0.0169943	ABC transporter family protein
TGME49_320460	8.04678	1.03653	0.00500073	0.0377086	ABC transporter transmembrane region domain-containing protein
TGME49_226790	38.7936	0.709502	0.00499568	0.0377086	ABC transporter, ATP-binding domain-containing protein
TGME49_208050	21.5034	1.26016	6.2219e-05	0.00153973	ABC transporter, putative
TGME49_246600	42.6398	0.788736	0.000590264	0.00843196	ABC1 family protein
TGME49_259115	39.951	0.838933	0.00244643	0.0228841	ABC1 family protein
TGME49_221320	206.164	1.10812	0.000396106	0.00644591	acetyl-CoA carboxylase ACC1
TGME49_218560	63.6494	1.3012	3.79972e-07	2.24219e-05	acetyl-coA carboxylase ACC2
TGME49_223390	76.4724	0.690086	0.00350245	0.0298039	activating signal cointegrator 1 complex subunit 3 family 1 ASCC3L1, putative
TGME49_249810	59.4038	0.515184	0.00257624	0.0238161	activating signal cointegrator 1 complex subunit 3, putative
TGME49_244290	23.0866	1.00697	0.000543937	0.00796124	adapter-related protein
TGME49_205550	24.8406	0.929149	0.000263244	0.00472322	AGC kinase
TGME49_208040	14.6243	0.744611	0.00488083	0.0372039	aldo-keto reductase
TGME49_262030	33.9351	0.918749	0.000548361	0.00797777	ALG6, ALG8 glycosyltransferase family protein
TGME49_214260	31.6022	0.705476	0.00198653	0.0198779	alpha-glucan water dikinase 1, putative
TGME49_261230	153.526	0.673825	0.000135514	0.00286165	ankyrin repeat-containing protein
TGME49_290630	25.1401	0.915021	0.000172698	0.00348375	AP2 domain transcription factor AP2IX-7
TGME49_306000	66.0423	0.947081	0.00098414	0.0121614	AP2 domain transcription factor AP2IX-8
TGME49_285895	32.7669	0.791193	0.00349305	0.0298039	AP2 domain transcription factor AP2V-2
TGME49_240900	50.362	0.750718	0.00247327	0.0231009	AP2 domain transcription factor AP2VI-2
TGME49_203710	127.19	0.923249	3.87534e-05	0.00105017	AP2 domain transcription factor AP2VIIa-4
TGME49_202490	204.312	1.26992	6.18916e-20	1.30261e-16	AP2 domain transcription factor AP2VIIa-7
TGME49_229370	44.7333	1.44423	3.26523e-09	4.12333e-07	AP2 domain transcription factor AP2VIII-1
TGME49_233120	16.7986	1.69581	7.10759e-12	1.72605e-09	AP2 domain transcription factor AP2VIII-2
TGME49_273660	61.2055	0.693564	0.00184688	0.0188107	AP2 domain transcription factor AP2VIII-3
TGME49_272710	24.5031	1.26616	5.06128e-06	0.000204209	AP2 domain transcription factor AP2VIII-4
TGME49_271030	76.9149	1.2801	2.9263e-06	0.000131976	AP2 domain transcription factor AP2VIII-6
TGME49_227900	37.4146	1.20235	4.13216e-09	4.82583e-07	AP2 domain transcription factor AP2X-1
TGME49_215570	19.2956	1.3007	4.74277e-06	0.000195724	AP2 domain transcription factor AP2X-11
TGME49_225110	32.9345	0.701201	0.00535189	0.0395689	AP2 domain transcription factor AP2X-2
TGME49_224230	9.98484	1.185	7.6384e-05	0.00180642	AP2 domain transcription factor AP2X-3
TGME49_237425	8.19336	1.67462	2.81671e-05	0.000815811	AP2 domain transcription factor AP2X-6
TGME49_214840	279.607	0.965039	2.80736e-12	7.7068e-10	AP2 domain transcription factor AP2X-7
TGME49_214960	59.3607	1.00821	5.72468e-05	0.00144582	AP2 domain transcription factor AP2X-8
TGME49_310900	87.3905	0.995425	1.39351e-06	6.71649e-05	AP2 domain transcription factor AP2XI-2
TGME49_310950	87.3473	0.682597	0.00044775	0.00696329	AP2 domain transcription factor AP2XI-3
TGME49_216220	28.2348	1.00737	1.18291e-05	0.000410379	AP2 domain transcription factor AP2XI-5
TGME49_218960	96.1637	0.906857	5.64796e-06	0.000220131	AP2 domain transcription factor AP2XII-1
TGME49_247700	63.9016	1.16519	1.32811e-06	6.45409e-05	AP2 domain transcription factor AP2XII-4
TGME49_250800	162.621	0.609475	2.16742e-05	0.00065167	AP2 domain transcription factor AP2XII-8
TGME49_262420	13.7755	0.944313	0.00274051	0.0248785	AP2 domain transcription factor APVIIb-1/ADA2-B
TGME49_315730	4.06505	2.4074	0.00210245	0.0206729	apical membrane antigen 1 protein
TGME49_314410	45.4097	0.581097	0.00446059	0.0351174	aquarius, putative
TGME49_246170	57.4138	0.90381	5.10483e-06	0.000204209	ARID/BRIGHT DNA binding domain-containing protein
TGME49_294770	65.1717	0.600128	0.00394037	0.0322273	Armadillo/beta-catenin family repeat-containing protein
TGME49_304630	52.8286	0.944073	8.20582e-06	0.000304774	ATG C terminal domain-containing protein
TGME49_288920	97.5842	0.683976	0.00353107	0.0299264	ATP-binding cassette G family transporter ABCG96
TGME49_249820	18.215	0.9135	0.0020463	0.020315	ATP-binding cassette sub-family B member 5
TGME49_223840	99.2932	0.757943	0.000301392	0.00527143	ATP-citrate lyase, putative
TGME49_202630	76.2528	0.636066	0.00181705	0.0187159	ATP-dependent metallopeptidase HflB subfamily protein
TGME49_233520	33.846	0.681563	0.00285138	0.0255733	ATP-dependent RNA helicase
TGME49_242625	39.1084	1.86507	1.0938e-08	1.07911e-06	ATPase family associated with various cellular activities (AAA) subfamily protein
TGME49_247390	21.3499	0.761427	0.00196333	0.0197396	ATPase, AAA family protein
TGME49_293260	89.0324	1.05231	5.26348e-05	0.00135096	ATPase/histidine kinase/DNA gyrase B/HSP90 domain-containing protein
TGME49_206450	90.514	1.07177	4.07953e-09	4.82583e-07	autophagy-related cysteine peptidase atg4, putative
TGME49_266366	282.227	0.981259	0.000745391	0.00997118	BT1 family protein
TGME49_295468	6.14638	1.1649	0.00147848	0.0164274	C2 domain-containing protein
TGME49_240390	3.31645	2.24162	0.000251674	0.00457945	calcium-dependent protein kinase
TGME49_293820	61.1555	0.585237	0.00127664	0.0146558	calpain family cysteine protease domain-containing protein
TGME49_310320	29.9485	0.768411	0.00145828	0.0163544	calreticulin family protein
TGME49_306480	14.8706	2.10553	6.63565e-07	3.70774e-05	CAM kinase, CDPK family
TGME49_215260	71.9637	1.12137	1.31533e-05	0.000441756	carbamoylphosphate synthetase
TGME49_202880	9.40983	0.98575	0.00676492	0.0464871	carrier superfamily protein
TGME49_247710	40.952	0.942765	0.000110913	0.00244862	casein kinase I
TGME49_219260	43.9188	1.15593	2.26311e-06	0.000105068	cation-transporting ATPase, putative
TGME49_291140	134.044	0.938678	1.7744e-05	0.00055676	CCR4-Not complex component, Not1 protein
TGME49_224480	38.2948	0.534571	0.00608761	0.0432364	cell-cycle-associated protein kinase CLK, putative
TGME49_253440	164.838	0.747552	0.000133457	0.00282768	cell-cycle-associated protein kinase SRPK, putative
TGME49_230150	17.7442	0.782846	0.00210527	0.0206729	ChAPs (Chs5p-Arf1p-binding proteins) protein
TGME49_265500	37.1207	1.17686	9.64763e-06	0.000349382	chloride transporter, chloride channel (ClC) family protein
TGME49_258240	77.3573	0.799238	0.000124983	0.00269332	chromodomain helicase DNA binding protein CHD1/SWI2/SNF2
TGME49_205240	57.2711	0.714458	0.000585125	0.00841567	cleft lip and palate transmembrane protein 1 (clptm1) protein
TGME49_250850	72.9858	0.752078	0.000102231	0.00231168	CMGC kinase, putative
TGME49_305340	98.9047	0.769682	0.000155888	0.00318489	corepressor complex CRC230
TGME49_267710	30.3889	0.860787	0.00223491	0.021511	CPSF A subunit region protein
TGME49_224280	25.0051	1.10078	1.32693e-06	6.45409e-05	CPSF A subunit region protein
TGME49_299210	114.397	0.514156	0.00154838	0.0169144	CTP synthase
TGME49_221200	48.1964	0.77454	5.39446e-05	0.00137897	CW-type Zinc Finger protein
TGME49_293280	6.73487	1.06543	0.0060372	0.0430367	cyclin protein
TGME49_305330	273.185	1.13089	3.11225e-15	3.27513e-12	cyclin, N-terminal domain-containing protein
TGME49_267580	45.6478	1.64468	5.48192e-14	3.46128e-11	cyclin2 related protein
TGME49_294350	89.9894	0.760747	0.000334627	0.00574139	DEAD/DEAH box helicase domain-containing protein
TGME49_284050	20.0563	0.773054	0.00669752	0.0463178	DEAD/DEAH box helicase domain-containing protein
TGME49_285660	18.7125	0.820997	0.0043752	0.0345886	DEAD/DEAH box helicase domain-containing protein
TGME49_242055	25.5247	0.898933	0.000939588	0.0118178	DEAD/DEAH box helicase domain-containing protein
TGME49_208842	107.086	0.910593	0.00208752	0.0205947	DEAD/DEAH box helicase domain-containing protein
TGME49_203840	12.4375	0.917535	0.00423353	0.0337081	DEAD/DEAH box helicase domain-containing protein
TGME49_267970	6.77649	1.09942	0.00513611	0.038429	DEAD/DEAH box helicase domain-containing protein
TGME49_264160	18.8946	1.63345	1.69837e-05	0.000538868	DEAD/DEAH box helicase domain-containing protein
TGME49_217910	63.0803	0.482777	0.00452951	0.0353952	DNA polymerase (pol2) superfamily protein
TGME49_319860	67.2168	0.577802	0.00150423	0.0166044	DNA polymerase family B protein
TGME49_264670	27.99	1.06465	0.000707438	0.00964744	DNA polymerase family B protein
TGME49_277530	8.31131	1.19794	0.00711564	0.0483098	DNA topoisomerase domain-containing protein
TGME49_244880	61.0472	1.0195	9.95654e-07	5.15292e-05	DNA-directed RNA polymerase I RPA1
TGME49_297530	26.8172	0.908788	0.000351947	0.00589441	DNA-directed RNA polymerase I RPA2
TGME49_258210	74.3255	0.871657	0.00180595	0.018693	DNA-directed RNA polymerase II RPB2
TGME49_224590	16.0961	0.920597	0.00113833	0.0135667	DNA-directed RNA polymerase III POLR3C
TGME49_272740	39.18	0.739011	0.00302002	0.0265577	DNA-directed RNA polymerase III RPC2
TGME49_313120	19.9642	1.00576	0.00607775	0.043215	DNA-directed RNA polymerase, alpha subunit
TGME49_207760	93.1512	1.08999	1.07999e-08	1.07911e-06	DnaJ C terminal region domain-containing protein
TGME49_224670	28.7252	0.917045	0.00023991	0.00446281	DnaJ domain-containing protein
TGME49_201670	33.7446	0.964111	0.000410136	0.00661594	DnaJ domain-containing protein
TGME49_214230	27.0433	0.92709	0.00437699	0.0345886	Dopey, N-terminal domain-containing protein
TGME49_294550	58.5983	1.02514	8.97044e-08	6.74278e-06	dynein heavy chain
TGME49_249840	11.6878	2.13435	3.06646e-05	0.000860515	dynein heavy chain 2, putative
TGME49_261022	139.853	0.761264	0.00012673	0.00272168	dynein heavy chain family protein
TGME49_289070	40.5486	0.695882	0.00252213	0.0234567	E1-E2 ATPase subfamily protein
TGME49_315860	24.2276	1.41325	4.20368e-09	4.82583e-07	EF hand domain-containing protein
TGME49_229630	100.14	1.29673	8.00884e-10	1.23336e-07	eIF2 kinase IF2K-A (incomplete catalytic triad)
TGME49_311510	152.427	0.646354	0.00137052	0.0155358	eIF2 kinase IF2K-B
TGME49_204100	24.2887	1.25125	2.00552e-05	0.000620729	eIF2 kinase IF2K-C
TGME49_319610	54.4326	1.04116	3.45531e-06	0.000150461	eIF2 kinase IF2K-D (incomplete catalytic triad)
TGME49_201120	57.1292	0.68262	0.00036287	0.00605154	ELMO/CED-12 family protein
TGME49_286080	50.9786	0.578766	0.00219916	0.0211992	elongation factor 2 family protein
TGME49_278550	23.2296	1.18074	4.90152e-06	0.000199738	elongation factor Tu GTP binding domain-containing protein
TGME49_238400	61.7081	0.874631	5.70085e-05	0.00144559	endonuclease/exonuclease/phosphatase domain-containing protein
TGME49_204410	27.7782	1.0267	1.3918e-05	0.000455327	endonuclease/exonuclease/phosphatase family protein
TGME49_305310	38.8516	0.732423	0.00500473	0.0377086	ERCC4 domain-containing protein
TGME49_201680	198.743	0.520561	0.000363545	0.00605154	eukaryotic initiation factor-3 subunit 10, putative
TGME49_232360	29.5935	0.627083	0.00451669	0.0353462	exonuclease
TGME49_248530	15.4667	1.11782	0.000364204	0.00605154	FATC domain-containing protein
TGME49_283702	47.5252	1.45162	5.27285e-12	1.3872e-09	FATC domain-containing protein
TGME49_269650	73.8026	0.982535	0.000337974	0.00576815	FFD and TFG box motifs protein
TGME49_301450	31.4198	0.745668	0.00350207	0.0298039	FG-GAP repeat-containing protein
TGME49_203830	35.127	0.805328	0.000444336	0.0069444	FHA domain-containing protein
TGME49_289050	67.6107	0.789761	1.99923e-05	0.000620729	FIKK kinase, putative
TGME49_206580	29.9199	1.01403	0.000295311	0.00520625	formin FRM2
TGME49_292020	56.8927	1.0385	3.05379e-06	0.000135786	GCC2 and GCC3 domain-containing protein
TGME49_207480	68.1855	1.39631	0.00084357	0.0108721	GCC2 and GCC3 domain-containing protein
TGME49_231480	76.2603	1.41589	3.52297e-07	2.11848e-05	GCN1, putative
TGME49_314240	60.2339	0.762449	0.00343614	0.029438	general transcription factor IIIC polypeptide 3 GTF3C3
TGME49_283820	25.8766	0.827905	0.00325273	0.0282112	glycine cleavage T-protein (aminomethyl transferase) domain-containing protein
TGME49_222800	34.5848	1.30332	2.70671e-06	0.000123842	glycogen synthase, putative
TGME49_320588	29.1393	0.882923	0.00470354	0.036403	glycosyl hydrolases family 35 protein
TGME49_209960	32.2422	0.63365	0.00604586	0.0430367	glycosyltransferase
TGME49_311920	73.1038	0.665635	0.000423165	0.00674714	GRAM domain-containing protein
TGME49_304990	62.684	0.638283	0.000451481	0.00699964	guanylate-binding protein, N-terminal domain-containing protein
TGME49_254370	82.8516	1.05198	9.88445e-09	1.00662e-06	guanylyl cyclase
TGME49_298610	94.8831	0.861305	1.29711e-07	9.20216e-06	GYF domain-containing protein
TGME49_204160	35.8097	1.18838	5.16368e-06	0.000205053	GYF domain-containing protein
TGME49_315670	37.8017	0.599517	0.0024435	0.0228841	HEAT repeat-containing protein
TGME49_295040	67.9948	0.630996	0.00152276	0.0167504	HEAT repeat-containing protein
TGME49_215040	36.7979	0.641374	0.00183269	0.0187957	HEAT repeat-containing protein
TGME49_216590	105.507	0.702352	5.82592e-05	0.00146553	HEAT repeat-containing protein
TGME49_280390	32.9727	0.757505	0.00250235	0.023338	HEAT repeat-containing protein
TGME49_231600	27.8858	0.964462	0.00227637	0.0217443	HEAT repeat-containing protein
TGME49_264752	17.3025	1.23746	0.00051402	0.00765453	HEAT repeat-containing protein
TGME49_201150	36.3535	0.701553	0.000314267	0.00546633	heavy metal translocating P-type ATPase subfamily protein
TGME49_275630	34.5566	0.69961	0.000755101	0.0100373	HECT-domain (ubiquitin-transferase) domain-containing protein
TGME49_209000	36.9698	0.828906	0.000256105	0.00463337	HECT-domain (ubiquitin-transferase) domain-containing protein
TGME49_291980	48.1062	0.937783	6.45443e-06	0.00024699	HECT-domain (ubiquitin-transferase) domain-containing protein
TGME49_280660	72.4026	1.29115	2.28487e-12	6.55759e-10	HECT-domain (ubiquitin-transferase) domain-containing protein
TGME49_295710	109.627	1.80881	3.25051e-11	6.62055e-09	HECT-domain (ubiquitin-transferase) domain-containing protein
TGME49_295070	26.3003	0.889259	0.000843729	0.0108721	helicase associated domain (ha2) protein
TGME49_318440	71.1744	0.939427	1.6208e-07	1.1004e-05	helicase associated domain (ha2) protein
TGME49_261850	25.6911	1.18206	7.88352e-06	0.000294536	helicase, putative
TGME49_304650	18.7578	0.860453	0.00187452	0.0190591	histidine acid phosphatase superfamily protein
TGME49_276180	38.9185	0.919014	1.35702e-05	0.000448198	histone acetyltransferase TAF1/250
TGME49_215560	34.0042	0.728272	0.00410299	0.0329177	histone arginine methyltransferase PRMT5
TGME49_281420	25.6822	0.818257	0.00521002	0.0387468	histone deacetylase HDAC1
TGME49_254555	22.3951	0.700974	0.0061976	0.0437263	histone lysine acetyltransferase GCN5-A
TGME49_226810	39.7833	1.26036	5.88649e-08	4.89392e-06	histone lysine methyltransferase SET1
TGME49_257770	14.9486	1.02345	0.000681029	0.00942986	histone lysine methyltransferase SET2
TGME49_295610	55.8139	1.32879	1.56708e-08	1.49917e-06	histone lysine methyltransferase, SET, putative
TGME49_242415	30.5148	1.16003	0.00118715	0.0139584	histone lysine-specific demethylase
TGME49_261940	19.99	1.19835	3.61244e-05	0.000991692	hydrolase, alpha/beta fold family protein
TGME49_227450	32.5071	1.18566	0.000159168	0.00322112	hydrolase, NUDIX family protein
TGME49_244460	77.9284	0.464217	0.00555059	0.04061	hypothetical protein
TGME49_278030	64.3637	0.499592	0.00448364	0.0351788	hypothetical protein
TGME49_239400	53.7723	0.508859	0.00471613	0.036403	hypothetical protein
TGME49_230170	54.2493	0.519995	0.00455172	0.0354541	hypothetical protein
TGME49_321540	59.807	0.534326	0.00262639	0.0240683	hypothetical protein
TGME49_243460	363.44	0.547905	5.04859e-05	0.0013118	hypothetical protein
TGME49_203980	96.9358	0.552112	0.000815851	0.0106431	hypothetical protein
TGME49_214300	27.2496	0.585027	0.00595604	0.0428319	hypothetical protein
TGME49_311460	80.4133	0.589982	0.000685303	0.0094523	hypothetical protein
TGME49_275490	35.0606	0.591509	0.00675848	0.0464871	hypothetical protein
TGME49_300052	41.7168	0.599745	0.00176154	0.0184004	hypothetical protein
TGME49_251450	27.9844	0.604899	0.00653872	0.0455187	hypothetical protein
TGME49_214750	76.5036	0.606944	0.00461328	0.0358281	hypothetical protein
TGME49_313540	98.718	0.616248	0.000459483	0.00709334	hypothetical protein
TGME49_247300	106.599	0.623214	0.000871585	0.0111176	hypothetical protein
TGME49_254570	44.328	0.623287	0.00385434	0.0317292	hypothetical protein
TGME49_264970	45.0032	0.627418	0.00376807	0.0312636	hypothetical protein
TGME49_321410	52.7437	0.628096	0.00375844	0.0312374	hypothetical protein
TGME49_289000	56.3428	0.632892	0.00568221	0.0414768	hypothetical protein
TGME49_236560	48.4184	0.636477	0.00489984	0.0372122	hypothetical protein
TGME49_203780	44.9375	0.639706	0.00161379	0.0172855	hypothetical protein
TGME49_297210	33.1519	0.64092	0.00357858	0.0301629	hypothetical protein
TGME49_310970	44.3408	0.641445	0.00412652	0.0329808	hypothetical protein
TGME49_310170	110.303	0.643343	0.000869398	0.0111176	hypothetical protein
TGME49_309890	41.7965	0.643468	0.00481534	0.03696	hypothetical protein
TGME49_219710	42.9028	0.644097	0.00140904	0.0159153	hypothetical protein
TGME49_212140	32.2505	0.649623	0.001936	0.019527	hypothetical protein
TGME49_289120	34.3459	0.655968	0.00541113	0.0399134	hypothetical protein
TGME49_315580	44.4379	0.65651	0.000828909	0.0107912	hypothetical protein
TGME49_271740	71.2324	0.6574	0.00343168	0.029438	hypothetical protein
TGME49_284180	167.795	0.657586	3.3571e-06	0.0001472	hypothetical protein
TGME49_207370	144.446	0.657942	0.0017229	0.0181005	hypothetical protein
TGME49_222240	60.1384	0.661285	0.00259111	0.0238836	hypothetical protein
TGME49_294730	28.5024	0.663083	0.00298379	0.0263123	hypothetical protein
TGME49_314020	30.9392	0.665226	0.0063071	0.0442724	hypothetical protein
TGME49_221280	25.9402	0.670971	0.00408087	0.0329177	hypothetical protein
TGME49_203880	46.9593	0.672262	0.00598594	0.0429175	hypothetical protein
TGME49_203370	65.207	0.672366	0.00488774	0.0372039	hypothetical protein
TGME49_230400	34.1582	0.672699	0.0069438	0.0474493	hypothetical protein
TGME49_277790	22.2187	0.673397	0.00648581	0.0452003	hypothetical protein
TGME49_282170	73.394	0.675839	0.00134648	0.0153184	hypothetical protein
TGME49_264140	57.1038	0.675872	0.00163363	0.017453	hypothetical protein
TGME49_276810	17.5305	0.677859	0.00602837	0.0430367	hypothetical protein
TGME49_221870	39.1135	0.681304	0.00371798	0.031011	hypothetical protein
TGME49_267690	22.9363	0.683027	0.00389258	0.0319192	hypothetical protein
TGME49_255300	34.1452	0.686118	0.00075184	0.010015	hypothetical protein
TGME49_222230	27.9633	0.686638	0.00701827	0.0477515	hypothetical protein
TGME49_215030	31.0224	0.689504	0.00496155	0.0375268	hypothetical protein
TGME49_293320	28.3098	0.69447	0.00481738	0.03696	hypothetical protein
TGME49_261430	28.2003	0.695503	0.00700209	0.0477442	hypothetical protein
TGME49_265090	148.27	0.69624	0.00181171	0.0187011	hypothetical protein
TGME49_227610	27.5675	0.69927	0.00692678	0.0473843	hypothetical protein
TGME49_205740	48.2267	0.701715	0.000526361	0.00780151	hypothetical protein
TGME49_202980	91.134	0.70391	0.00454288	0.0354541	hypothetical protein
TGME49_215080	15.1539	0.706536	0.00507612	0.038201	hypothetical protein
TGME49_247040	45.8107	0.709233	0.00237786	0.0224757	hypothetical protein
TGME49_237530	30.5333	0.709639	0.00214106	0.0208621	hypothetical protein
TGME49_254230	19.8162	0.710006	0.00583297	0.0421218	hypothetical protein
TGME49_239410	116.269	0.71445	1.24199e-05	0.000426192	hypothetical protein
TGME49_205562	45.0732	0.718514	0.00117378	0.0138528	hypothetical protein
TGME49_265850	23.2744	0.720782	0.00407388	0.0329177	hypothetical protein
TGME49_300330	22.7827	0.721761	0.00577482	0.041846	hypothetical protein
TGME49_237520	37.9301	0.724102	0.00105724	0.0127882	hypothetical protein
TGME49_201140	23.5584	0.725866	0.00464506	0.0360306	hypothetical protein
TGME49_315530	55.0191	0.72792	0.000433745	0.00684666	hypothetical protein
TGME49_293840	191.465	0.730022	0.00215545	0.0209699	hypothetical protein
TGME49_275990	27.5392	0.733796	0.0018024	0.018687	hypothetical protein
TGME49_247330	41.9543	0.736096	0.0033827	0.0290986	hypothetical protein
TGME49_216580	15.5796	0.738088	0.00596453	0.0428442	hypothetical protein
TGME49_235630	23.5154	0.743183	0.00189222	0.0192082	hypothetical protein
TGME49_204380	35.0146	0.746884	0.000350771	0.00589034	hypothetical protein
TGME49_206670	54.3289	0.747239	4.93684e-05	0.00128807	hypothetical protein
TGME49_308030	31.0216	0.749326	0.00244212	0.0228841	hypothetical protein
TGME49_248120	45.6895	0.749338	0.000232975	0.00437799	hypothetical protein
TGME49_224070	25.4094	0.752788	0.00100018	0.0122387	hypothetical protein
TGME49_233870	52.4562	0.756041	0.00569434	0.0414917	hypothetical protein
TGME49_313110	17.2093	0.759103	0.00643895	0.0450227	hypothetical protein
TGME49_247050	30.8911	0.7605	0.00181265	0.0187011	hypothetical protein
TGME49_215710	35.942	0.769464	0.00717671	0.0486721	hypothetical protein
TGME49_233490	31.7913	0.770143	0.0027665	0.0249538	hypothetical protein
TGME49_263610	27.4658	0.772616	0.00253974	0.0235822	hypothetical protein
TGME49_230940	211.004	0.778606	6.37008e-08	5.09123e-06	hypothetical protein
TGME49_242640	37.879	0.780733	0.00159736	0.0172283	hypothetical protein
TGME49_253490	49.9913	0.78624	0.000428533	0.00678135	hypothetical protein
TGME49_250700	66.6396	0.787933	1.08629e-05	0.000381046	hypothetical protein
TGME49_268170	20.1405	0.788208	0.00295841	0.0261347	hypothetical protein
TGME49_218070	32.5062	0.788588	0.00600084	0.0429175	hypothetical protein
TGME49_253615	25.8496	0.7894	0.00168221	0.0177914	hypothetical protein
TGME49_251890	24.7217	0.789412	0.00358286	0.0301629	hypothetical protein
TGME49_297690	15.6761	0.79051	0.00191806	0.019408	hypothetical protein
TGME49_214900	39.0553	0.79497	0.000545964	0.00796124	hypothetical protein
TGME49_211640	26.6478	0.795002	0.000545876	0.00796124	hypothetical protein
TGME49_294860	29.6376	0.796326	0.000263315	0.00472322	hypothetical protein
TGME49_203730	30.1183	0.797324	0.0026658	0.0243389	hypothetical protein
TGME49_240380	115.039	0.804642	7.39914e-05	0.00177208	hypothetical protein
TGME49_305990	20.0281	0.805254	0.000496684	0.00744908	hypothetical protein
TGME49_219440	27.0581	0.808147	0.00544776	0.0400899	hypothetical protein
TGME49_248610	31.1475	0.812464	0.00224266	0.0215213	hypothetical protein
TGME49_264090	24.3997	0.81326	0.00422572	0.0336884	hypothetical protein
TGME49_288190	24.5412	0.819647	0.00396262	0.0323022	hypothetical protein
TGME49_253990	34.7101	0.825424	0.0022462	0.0215213	hypothetical protein
TGME49_227115	11.2833	0.82667	0.00705292	0.0479356	hypothetical protein
TGME49_230010	62.6038	0.827191	0.000698484	0.00956666	hypothetical protein
TGME49_237290	68.9226	0.830972	1.48987e-05	0.000477514	hypothetical protein
TGME49_305620	17.4273	0.834393	0.00495026	0.0375221	hypothetical protein
TGME49_290678	32.0606	0.835924	0.000673195	0.00934187	hypothetical protein
TGME49_226470	51.3373	0.836661	0.000904597	0.0114922	hypothetical protein
TGME49_276900	32.188	0.841759	0.00407108	0.0329177	hypothetical protein
TGME49_313370	45.1706	0.841762	0.000149382	0.00309245	hypothetical protein
TGME49_291150	16.5891	0.841964	0.00331416	0.0286652	hypothetical protein
TGME49_234640	33.419	0.842603	0.00156339	0.0169901	hypothetical protein
TGME49_261960	10.1726	0.846222	0.00681686	0.0466829	hypothetical protein
TGME49_309250	29.2134	0.84667	0.000153293	0.00315274	hypothetical protein
TGME49_314850	43.2768	0.84689	0.00424023	0.0337154	hypothetical protein
TGME49_220630	200.658	0.853211	0.000989507	0.0121614	hypothetical protein
TGME49_225090	51.4026	0.854154	0.000387154	0.00636585	hypothetical protein
TGME49_272550	33.4683	0.854923	0.00147335	0.0164069	hypothetical protein
TGME49_239885	17.0106	0.856677	0.00295142	0.0261347	hypothetical protein
TGME49_313030	24.5971	0.856766	0.00119544	0.0140298	hypothetical protein
TGME49_233160	51.1786	0.860315	0.000102523	0.00231168	hypothetical protein
TGME49_294740	52.4467	0.862507	0.000390784	0.00640886	hypothetical protein
TGME49_224920	20.532	0.865829	0.000141014	0.00295801	hypothetical protein
TGME49_306400	64.1463	0.86717	2.59082e-06	0.000119405	hypothetical protein
TGME49_290225	18.8259	0.869013	0.0022974	0.0219121	hypothetical protein
TGME49_283550	71.6871	0.872188	0.000111824	0.00245159	hypothetical protein
TGME49_310560	9.47385	0.87233	0.00489059	0.0372039	hypothetical protein
TGME49_260840	21.8834	0.874678	0.00648328	0.0452003	hypothetical protein
TGME49_297330	23.2762	0.877949	0.00056019	0.00809552	hypothetical protein
TGME49_320080	132.65	0.877978	2.2633e-09	2.91642e-07	hypothetical protein
TGME49_295000	14.5143	0.878473	0.000841676	0.0108721	hypothetical protein
TGME49_312840	42.7913	0.880169	0.000484467	0.00735319	hypothetical protein
TGME49_271145	20.0871	0.881873	0.00201325	0.02005	hypothetical protein
TGME49_270930	38.3176	0.882408	0.000711155	0.00967722	hypothetical protein
TGME49_314920	26.651	0.882747	0.00132821	0.0151378	hypothetical protein
TGME49_271010	24.1937	0.883438	0.00217044	0.0210509	hypothetical protein
TGME49_267855	44.7276	0.885212	4.61939e-05	0.00122037	hypothetical protein
TGME49_209500	55.1348	0.885402	1.10412e-05	0.000385162	hypothetical protein
TGME49_234560	22.8662	0.885883	0.00289736	0.0257661	hypothetical protein
TGME49_284040	29.9563	0.886239	9.18912e-05	0.00211288	hypothetical protein
TGME49_269710	49.5081	0.890002	0.00200826	0.0200318	hypothetical protein
TGME49_296231	75.314	0.891839	0.00565242	0.0413072	hypothetical protein
TGME49_204310	99.0926	0.895785	5.91216e-09	6.4361e-07	hypothetical protein
TGME49_299010	21.0635	0.898151	0.000107264	0.00239317	hypothetical protein
TGME49_219485	37.7596	0.902027	0.000720767	0.00974502	hypothetical protein
TGME49_249490	29.7987	0.903571	0.000540006	0.00796124	hypothetical protein
TGME49_227780	54.4088	0.904616	0.000870256	0.0111176	hypothetical protein
TGME49_299000	50.5666	0.906485	0.00167536	0.0177487	hypothetical protein
TGME49_240050	23.9152	0.908388	0.000233925	0.00438279	hypothetical protein
TGME49_242890	38.8904	0.913039	0.000191857	0.00379744	hypothetical protein
TGME49_221400	140.54	0.916578	5.24161e-06	0.000206847	hypothetical protein
TGME49_289520	42.5933	0.917872	7.10069e-05	0.00171777	hypothetical protein
TGME49_267650	15.0894	0.918636	0.000387054	0.00636585	hypothetical protein
TGME49_318400	60.8959	0.919712	1.07443e-06	5.47092e-05	hypothetical protein
TGME49_274010	14.0362	0.921553	0.000417567	0.00669167	hypothetical protein
TGME49_288460	48.0108	0.931792	0.000702044	0.0095946	hypothetical protein
TGME49_214610	16.5441	0.933072	0.00236926	0.0224617	hypothetical protein
TGME49_277050	7.45342	0.935193	0.00678346	0.0465552	hypothetical protein
TGME49_225230	20.2802	0.935421	0.00295597	0.0261347	hypothetical protein
TGME49_320592	25.3875	0.93642	0.00174044	0.0182544	hypothetical protein
TGME49_209280	59.3938	0.94124	0.000973813	0.0121515	hypothetical protein
TGME49_207100	33.2714	0.942557	0.00010288	0.00231168	hypothetical protein
TGME49_238390	80.3274	0.943408	2.38869e-07	1.539e-05	hypothetical protein
TGME49_295980	30.7181	0.946112	0.00380765	0.0315179	hypothetical protein
TGME49_238020	41.9458	0.95285	0.000286268	0.00506301	hypothetical protein
TGME49_316610	8.05349	0.954649	0.00588054	0.0423855	hypothetical protein
TGME49_271470	23.8814	0.958551	0.00383552	0.0316155	hypothetical protein
TGME49_273595	15.4297	0.966643	0.000469616	0.00721449	hypothetical protein
TGME49_313495	14.1255	0.968652	0.000229309	0.00432197	hypothetical protein
TGME49_244140	18.7185	0.970917	0.000592277	0.00844126	hypothetical protein
TGME49_298820	6.80695	0.972259	0.0048905	0.0372039	hypothetical protein
TGME49_232980	23.3008	0.972894	0.00086448	0.0110942	hypothetical protein
TGME49_320010	74.5282	0.988108	0.000627706	0.00876844	hypothetical protein
TGME49_214600	41.767	0.990035	1.67258e-06	7.88112e-05	hypothetical protein
TGME49_270060	28.2279	0.991869	0.00342296	0.0294048	hypothetical protein
TGME49_244050	10.271	0.993558	0.00513685	0.038429	hypothetical protein
TGME49_310720	18.4825	0.998263	9.91504e-05	0.00225193	hypothetical protein
TGME49_203260	9.80908	1.00106	0.00171381	0.018035	hypothetical protein
TGME49_269420	73.7428	1.0051	2.83777e-07	1.75663e-05	hypothetical protein
TGME49_269990	23.7935	1.00551	0.000182705	0.00363084	hypothetical protein
TGME49_268010	11.9702	1.00733	0.00034662	0.00585177	hypothetical protein
TGME49_207720	25.9295	1.01088	0.00305223	0.0268036	hypothetical protein
TGME49_226350	10.0901	1.01696	0.0030177	0.0265577	hypothetical protein
TGME49_292235	12.5895	1.01791	0.00180061	0.018687	hypothetical protein
TGME49_280522	45.0631	1.02685	0.000660024	0.00919953	hypothetical protein
TGME49_222050	41.5124	1.02713	0.000796243	0.0104594	hypothetical protein
TGME49_234230	53.5183	1.03111	4.04873e-06	0.000172128	hypothetical protein
TGME49_257780	12.4078	1.03117	0.000488481	0.00736102	hypothetical protein
TGME49_228670	17.2881	1.03273	0.000248336	0.00455811	hypothetical protein
TGME49_278205	76.3875	1.03478	0.00029684	0.00520625	hypothetical protein
TGME49_286270	48.6338	1.03713	7.97678e-08	6.14212e-06	hypothetical protein
TGME49_203480	20.9884	1.03923	0.000893492	0.011374	hypothetical protein
TGME49_211150	31.5874	1.03929	6.14579e-05	0.00152774	hypothetical protein
TGME49_306890	34.6759	1.04215	0.00400527	0.0325112	hypothetical protein
TGME49_263230	61.4962	1.04247	0.000552869	0.00802486	hypothetical protein
TGME49_296121	57.9635	1.04248	0.00219758	0.0211992	hypothetical protein
TGME49_286230	19.3489	1.04289	8.46079e-06	0.000312406	hypothetical protein
TGME49_214830	20.4453	1.04478	0.000129748	0.00275835	hypothetical protein
TGME49_271110	11.768	1.04577	0.00176311	0.0184004	hypothetical protein
TGME49_242435	10.3105	1.05097	0.00236105	0.0224175	hypothetical protein
TGME49_230110	14.2265	1.05256	0.000603915	0.00854959	hypothetical protein
TGME49_281640	22.4389	1.05356	0.0044851	0.0351788	hypothetical protein
TGME49_257580	6.21268	1.05409	0.00621507	0.043748	hypothetical protein
TGME49_247280	15.2023	1.05579	0.00272316	0.0248111	hypothetical protein
TGME49_287480	68.0839	1.05845	1.28403e-07	9.20216e-06	hypothetical protein
TGME49_204315	7.62462	1.06046	0.00126459	0.014597	hypothetical protein
TGME49_264170	16.8421	1.06064	0.000242619	0.00449236	hypothetical protein
TGME49_239270	144.538	1.06162	0.000251037	0.00457945	hypothetical protein
TGME49_291180	90.5925	1.06582	1.64214e-08	1.54753e-06	hypothetical protein
TGME49_210300	80.0483	1.06802	0.00022705	0.0042922	hypothetical protein
TGME49_227350	22.9179	1.07092	0.00029632	0.00520625	hypothetical protein
TGME49_291350	22.9333	1.07129	0.000560302	0.00809552	hypothetical protein
TGME49_241710	19.0982	1.07159	0.000427294	0.00678135	hypothetical protein
TGME49_200410	21.1761	1.07172	0.000141889	0.00295917	hypothetical protein
TGME49_306300	32.4215	1.07319	0.000491627	0.00739079	hypothetical protein
TGME49_268176	95.073	1.07533	8.67337e-07	4.76206e-05	hypothetical protein
TGME49_245580	23.0511	1.07934	0.000481379	0.00735319	hypothetical protein
TGME49_304910	23.4471	1.08092	0.00534763	0.0395689	hypothetical protein
TGME49_223080	214.487	1.08567	1.02642e-05	0.00036409	hypothetical protein
TGME49_254910	17.6463	1.09102	0.0007968	0.0104594	hypothetical protein
TGME49_269670	18.169	1.09155	0.00541821	0.039919	hypothetical protein
TGME49_215950	50.1065	1.09198	3.76474e-08	3.30147e-06	hypothetical protein
TGME49_210235	14.1989	1.09279	0.00701777	0.0477515	hypothetical protein
TGME49_232680	21.6864	1.09861	0.000428025	0.00678135	hypothetical protein
TGME49_228070	27.915	1.09966	0.000442332	0.00693023	hypothetical protein
TGME49_261490	52.3626	1.10013	0.000155177	0.00318113	hypothetical protein
TGME49_236930	16.8867	1.10158	0.000182865	0.00363084	hypothetical protein
TGME49_221720	51.1252	1.10339	4.43464e-10	7.17957e-08	hypothetical protein
TGME49_221690	36.5085	1.10592	1.39761e-07	9.80502e-06	hypothetical protein
TGME49_215910	128.376	1.10703	8.41151e-09	8.7066e-07	hypothetical protein
TGME49_316510	132.036	1.10946	6.24281e-05	0.00153973	hypothetical protein
TGME49_311860	36.5611	1.11071	0.000111563	0.00245159	hypothetical protein
TGME49_201180	23.0909	1.11247	0.00361809	0.0304189	hypothetical protein
TGME49_268330	63.1025	1.11289	3.33126e-06	0.000147088	hypothetical protein
TGME49_307860	132.772	1.1194	6.36104e-08	5.09123e-06	hypothetical protein
TGME49_318390	80.4679	1.12216	0.000614063	0.00863217	hypothetical protein
TGME49_311030	51.5965	1.12332	1.07373e-06	5.47092e-05	hypothetical protein
TGME49_220520	23.2415	1.12529	1.11258e-06	5.57529e-05	hypothetical protein
TGME49_218955	5.75862	1.12746	0.0035764	0.0301629	hypothetical protein
TGME49_305470	48.7703	1.12991	3.35632e-09	4.15525e-07	hypothetical protein
TGME49_274000	30.0341	1.14109	2.79337e-07	1.74627e-05	hypothetical protein
TGME49_269620	40.1606	1.14336	9.20755e-06	0.000338003	hypothetical protein
TGME49_262880	29.3076	1.14463	0.000138788	0.00292103	hypothetical protein
TGME49_233245	19.3189	1.15097	0.000103323	0.00231342	hypothetical protein
TGME49_258670	13.2264	1.15309	7.6388e-05	0.00180642	hypothetical protein
TGME49_264890	9.67675	1.16457	0.000943694	0.0118459	hypothetical protein
TGME49_202080	8.18971	1.17546	0.000779698	0.0103021	hypothetical protein
TGME49_248720	84.3826	1.18087	5.92419e-07	3.33976e-05	hypothetical protein
TGME49_281440	110.686	1.18715	1.49724e-13	7.27199e-11	hypothetical protein
TGME49_226660	42.2388	1.18756	3.67431e-08	3.26755e-06	hypothetical protein
TGME49_247450	96.1608	1.19205	3.59532e-08	3.24298e-06	hypothetical protein
TGME49_267790	4.31198	1.19355	0.00470935	0.036403	hypothetical protein
TGME49_232080	57.8898	1.19824	5.15061e-09	5.80732e-07	hypothetical protein
TGME49_248510	16.461	1.20126	6.67647e-06	0.000253947	hypothetical protein
TGME49_268240	27.4254	1.20698	0.00211691	0.0207279	hypothetical protein
TGME49_270720	19.0357	1.20871	1.46847e-05	0.000474383	hypothetical protein
TGME49_314690	44.6578	1.21647	0.00149812	0.0165659	hypothetical protein
TGME49_297745	90.6542	1.21654	1.77057e-13	7.45291e-11	hypothetical protein
TGME49_320550	38.1479	1.22081	1.62627e-06	7.76652e-05	hypothetical protein
TGME49_299130	14.0218	1.22346	0.00243124	0.0228775	hypothetical protein
TGME49_219460	26.1656	1.22958	6.13025e-06	0.000236015	hypothetical protein
TGME49_216335	149.708	1.23109	9.59244e-08	7.12549e-06	hypothetical protein
TGME49_203665	13.4804	1.23153	4.31781e-06	0.000180547	hypothetical protein
TGME49_224160	19.4405	1.23326	3.29792e-05	0.000917316	hypothetical protein
TGME49_216070	30.8444	1.23398	0.000207716	0.00407304	hypothetical protein
TGME49_314570	7.77276	1.24275	0.000260917	0.00470694	hypothetical protein
TGME49_305080	8.54962	1.24929	0.000338013	0.00576815	hypothetical protein
TGME49_305790	7.39651	1.25319	0.0050957	0.0382117	hypothetical protein
TGME49_232970	10.732	1.26272	2.40648e-05	0.000710025	hypothetical protein
TGME49_228120	61.0095	1.26511	5.31281e-08	4.53312e-06	hypothetical protein
TGME49_270150	14.1158	1.27232	2.07417e-05	0.000635742	hypothetical protein
TGME49_214140	98.3012	1.2768	6.07449e-08	4.98108e-06	hypothetical protein
TGME49_296950	41.3166	1.28284	0.000238324	0.00445201	hypothetical protein
TGME49_271033	4.2223	1.29133	0.00258243	0.0238384	hypothetical protein
TGME49_227300	6.80074	1.29289	0.000343053	0.00582269	hypothetical protein
TGME49_257360	4.18753	1.29693	0.00508743	0.0382111	hypothetical protein
TGME49_242780	54.7533	1.29894	2.62237e-07	1.67249e-05	hypothetical protein
TGME49_279320	70.1342	1.30008	6.63287e-15	5.235e-12	hypothetical protein
TGME49_258970	36.4179	1.30044	1.24832e-09	1.79134e-07	hypothetical protein
TGME49_241850	37.7713	1.31851	1.85514e-11	3.9735e-09	hypothetical protein
TGME49_261660	21.1747	1.31853	7.69796e-06	0.000289315	hypothetical protein
TGME49_284310	12.1709	1.32655	0.000323865	0.00558711	hypothetical protein
TGME49_205500	45.1545	1.3316	0.000726198	0.00979747	hypothetical protein
TGME49_301480	15.8085	1.33315	0.00391343	0.0320485	hypothetical protein
TGME49_266368	49.8481	1.34576	0.00011813	0.00257197	hypothetical protein
TGME49_313430	46.4392	1.35673	8.82703e-08	6.71492e-06	hypothetical protein
TGME49_235420	66.7787	1.35778	3.2365e-14	2.27058e-11	hypothetical protein
TGME49_311070	33.1544	1.3624	9.11296e-07	4.87621e-05	hypothetical protein
TGME49_213300	19.4078	1.36361	4.3531e-05	0.0011696	hypothetical protein
TGME49_245560	48.9112	1.36677	7.18778e-05	0.0017322	hypothetical protein
TGME49_270570	11.2903	1.3706	8.76174e-05	0.00203388	hypothetical protein
TGME49_235430	6.6543	1.38775	0.000407702	0.00660059	hypothetical protein
TGME49_233430	17.629	1.38807	1.63596e-06	7.76652e-05	hypothetical protein
TGME49_201820	27.6249	1.40353	1.47077e-07	1.02049e-05	hypothetical protein
TGME49_310122	12.364	1.4059	0.00148039	0.0164274	hypothetical protein
TGME49_216210	40.8092	1.41873	2.0982e-05	0.000637592	hypothetical protein
TGME49_224870	51.2538	1.42058	1.11469e-07	8.18391e-06	hypothetical protein
TGME49_267585	11.1932	1.42291	4.69391e-06	0.000194982	hypothetical protein
TGME49_269290	24.2612	1.42299	6.92627e-09	7.28874e-07	hypothetical protein
TGME49_225745	14.4246	1.42454	2.00602e-07	1.31938e-05	hypothetical protein
TGME49_295380	10.2351	1.44619	0.00232646	0.0221558	hypothetical protein
TGME49_272155	56.4574	1.44948	1.06539e-09	1.56439e-07	hypothetical protein
TGME49_262550	25.6928	1.4569	0.000142006	0.00295917	hypothetical protein
TGME49_288940	44.7081	1.45774	5.89069e-08	4.89392e-06	hypothetical protein
TGME49_210700	56.6691	1.46814	2.38288e-08	2.18051e-06	hypothetical protein
TGME49_256220	7.28479	1.48576	0.000812867	0.0106431	hypothetical protein
TGME49_213020	27.9765	1.50623	1.81083e-10	3.09016e-08	hypothetical protein
TGME49_226620	38.5334	1.53247	1.88795e-11	3.9735e-09	hypothetical protein
TGME49_304720	19.4275	1.54449	4.11411e-07	2.40523e-05	hypothetical protein
TGME49_276155	5.04322	1.54672	0.00409748	0.0329177	hypothetical protein
TGME49_256650	9.27838	1.5642	0.00106318	0.0128122	hypothetical protein
TGME49_225000	62.2043	1.56628	3.50698e-09	4.25828e-07	hypothetical protein
TGME49_210245	26.9951	1.59963	1.6919e-07	1.13645e-05	hypothetical protein
TGME49_202070	33.3556	1.60657	2.63191e-13	1.03862e-10	hypothetical protein
TGME49_235635	8.20397	1.62048	0.0026394	0.0241525	hypothetical protein
TGME49_229720	36.6276	1.64122	3.65625e-17	5.7714e-14	hypothetical protein
TGME49_306020	18.3412	1.65765	5.51029e-12	1.39168e-09	hypothetical protein
TGME49_228150	58.2196	1.65944	3.06147e-10	5.08687e-08	hypothetical protein
TGME49_270750	28.2122	1.66285	2.1004e-05	0.000637592	hypothetical protein
TGME49_268780	30.5699	1.68861	9.55582e-11	1.72387e-08	hypothetical protein
TGME49_209440	78.6105	1.71019	4.67341e-10	7.37697e-08	hypothetical protein
TGME49_316470	14.5165	1.73442	2.02998e-09	2.72709e-07	hypothetical protein
TGME49_313630	24.9658	1.74693	6.87492e-09	7.28874e-07	hypothetical protein
TGME49_264790	27.4108	1.75513	4.28195e-07	2.48039e-05	hypothetical protein
TGME49_213255	8.2127	1.79704	0.00279045	0.0251339	hypothetical protein
TGME49_319312	2.98022	1.81356	0.00113227	0.0135658	hypothetical protein
TGME49_268035	4.8126	1.94659	0.0009283	0.0117226	hypothetical protein
TGME49_228395	5.64473	1.95901	0.000110711	0.00244862	hypothetical protein
TGME49_221220	11.4854	2.03864	0.00184078	0.0188069	hypothetical protein
TGME49_248540	7.19053	2.1631	3.64725e-07	2.17252e-05	hypothetical protein
TGME49_214990	32.1125	2.18496	3.86465e-13	1.43538e-10	hypothetical protein
TGME49_214510	9.93824	2.28609	0.00161521	0.0172855	hypothetical protein
TGME49_230000	80.9919	2.29682	8.60245e-42	5.43159e-38	hypothetical protein
TGME49_276200	11.3317	2.30595	0.00012885	0.00275782	hypothetical protein
TGME49_216190	26.512	2.32689	1.02645e-11	2.31464e-09	hypothetical protein
TGME49_313270	50.6907	2.37863	1.047e-16	1.32215e-13	hypothetical protein
TGME49_254160	11.9953	2.4083	0.0012669	0.014597	hypothetical protein
TGME49_214620	41.7869	0.723715	0.00135871	0.0154297	hypoxia- inducible factor prolyl hydroxylase (phd2), putative
TGME49_206490	73.5372	0.988799	0.00311968	0.0272067	ICE family protease (caspase) p20 domain-containing protein
TGME49_243298	12.333	1.03218	0.00675609	0.0464871	ICE family protease (caspase) p20 domain-containing protein
TGME49_226950	31.9709	1.23109	4.06194e-06	0.000172128	IgA-specific metalloendopeptidase
TGME49_253730	59.0967	0.580161	0.00583277	0.0421218	importin-beta N-terminal domain-containing protein
TGME49_222380	106.54	0.62604	0.000211471	0.0041325	importin-beta N-terminal domain-containing protein
TGME49_233710	19.949	1.12266	0.000226792	0.0042922	inorganic anion transporter, sulfate permease (SulP) family protein
TGME49_208070	23.0776	1.17824	2.99815e-06	0.000134257	inositol polyphosphate kinase
TGME49_273380	14.2697	1.16951	3.09879e-05	0.000865743	ion channel protein
TGME49_262120	65.9608	0.631062	0.00593071	0.0426984	IQ calmodulin-binding motif domain-containing protein
TGME49_207640	68.0853	0.491698	0.0067538	0.0464871	isoleucyl-tRNA synthetase family protein
TGME49_277030	94.4767	0.645006	0.00396578	0.0323022	isoleucyl-tRNA synthetase, putative
TGME49_264940	50.6307	0.688237	0.00240542	0.0226684	kelch repeat-containing protein
TGME49_261080	90.55	0.582423	0.00124522	0.0144528	kringle domain-containing protein
TGME49_252070	57.9597	0.938544	0.00320612	0.0278835	KRUF family protein
TGME49_251170	31.047	1.1821	0.00356139	0.0301429	KRUF family protein
TGME49_250955	68.7609	1.38272	0.00014773	0.00306831	KRUF family protein
TGME49_220230	12.9021	0.794741	0.00496276	0.0375268	leucine rich repeat-containing protein
TGME49_308580	25.8924	0.772213	0.00107215	0.0128944	Lon protease family protein
TGME49_231440	67.0399	1.00633	2.50049e-05	0.000730931	LsmAD domain-containing protein
TGME49_310100	6.71986	1.04016	0.00451765	0.0353462	mannosyltransferase (pig-m) protein
TGME49_229310	22.7419	1.16213	2.0485e-05	0.000630937	mediator complex subunit MED14
TGME49_321340	24.0398	0.892818	0.000713234	0.00967955	membrane protein, putative
TGME49_211330	16.907	0.931788	0.00416947	0.033282	methionine aminopeptidase
TGME49_208730	84.6393	1.57945	0.00633571	0.0443992	microneme protein, putative
TGME49_254940	187.098	1.08886	1.67656e-13	7.45291e-11	MIF4G domain-containing protein
TGME49_269180	146.92	1.53978	6.38062e-25	2.01436e-21	MIF4G domain-containing protein
TGME49_297150	51.1766	0.866072	0.00261556	0.0240387	MORN repeat-containing protein
TGME49_223060	31.0408	0.993596	0.000483974	0.00735319	MORN repeat-containing protein
TGME49_218840	20.4413	0.848006	0.00326299	0.0282614	mutS domain protein
TGME49_203950	55.2239	0.745482	0.00213094	0.0208278	Myb family DNA-binding domain-containing protein
TGME49_200385	76.0276	0.914562	1.34571e-05	0.000448198	Myb family DNA-binding domain-containing protein
TGME49_213890	8.55381	1.20724	0.00113935	0.0135667	Myb family DNA-binding domain-containing protein
TGME49_259200	35.7129	1.29492	1.58142e-07	1.08533e-05	Na+/H+ exchanger NHE1
TGME49_288440	65.5824	1.03889	8.88142e-07	4.81556e-05	NEK kinase
TGME49_259920	10.4212	1.10211	0.00408909	0.0329177	Nitric-oxide synthase
TGME49_286160	23.9586	0.824475	0.000124916	0.00269332	non-specific serine/threonine protein kinase
TGME49_268370	81.5771	1.64235	1.09665e-13	5.77022e-11	non-specific serine/threonine protein kinase
TGME49_243960	63.1917	0.939153	1.41512e-05	0.000460571	nuclear transport factor 2 (ntf2) domain-containing protein
TGME49_259640	73.8331	0.75932	0.000611077	0.00863163	nucleoporin autopeptidase
TGME49_233130	11.0257	1.04382	0.00210364	0.0206729	nucleoside transporter protein
TGME49_273500	13.3345	0.936487	0.00179001	0.0186197	O-linked N-acetylglucosamine transferase
TGME49_270100	28.1376	1.04573	0.00146904	0.0164069	oxidoreductase, aldo/keto reductase family protein
TGME49_278660	143.234	0.728769	0.000588629	0.00842767	P-type ATPase4, putative
TGME49_253900	93.579	0.776354	0.00243937	0.0228841	parasite porphobilinogen synthase PBGS
TGME49_250760	98.0246	0.874985	0.00487334	0.0372039	pentatricopeptide repeat domain-containing protein
TGME49_252210	325.425	1.3203	0.00114109	0.0135667	pentatricopeptide repeat domain-containing protein
TGME49_289730	37.738	0.523438	0.00604168	0.0430367	Pep3/Vps18/deep orange family protein
TGME49_262825	11.3649	1.2067	7.8752e-05	0.00184848	peptidase family c50 protein
TGME49_227948	70.1969	0.522273	0.00357838	0.0301629	peptidase M16 inactive domain-containing protein
TGME49_253890	29.1291	0.647705	0.00266749	0.0243389	peptidase M16 inactive domain-containing protein
TGME49_295680	20.6378	0.824892	0.00600193	0.0429175	periodic tryptophan protein PWP2, putative
TGME49_310350	31.2015	0.84138	0.000283716	0.00503198	PGAP1 family protein
TGME49_208200	18.3011	0.843344	0.00614944	0.0435286	PHD-finger domain-containing protein
TGME49_234900	105.411	1.17308	1.04924e-09	1.56439e-07	PHD-finger domain-containing protein
TGME49_224260	89.0103	1.18719	1.49031e-08	1.44767e-06	PHD-finger domain-containing protein
TGME49_240210	10.0698	0.875616	0.00286586	0.0256304	phosphate transporter family protein, putative
TGME49_276170	123.119	0.466414	0.00412092	0.0329778	phosphatidylinositol 3- and 4-kinase
TGME49_215700	26.5744	0.814789	0.000984798	0.0121614	phosphatidylinositol 3- and 4-kinase
TGME49_266010	37.687	1.08485	3.29654e-07	2.00138e-05	phosphatidylinositol 3- and 4-kinase
TGME49_228690	56.1707	1.19575	4.01923e-11	7.93044e-09	phosphatidylinositol 3- and 4-kinase
TGME49_289570	53.492	0.85664	0.000441082	0.00692783	phosphatidylinositol transfer protein
TGME49_310280	30.2666	0.80671	0.00130794	0.0149607	Phosphoethanolamine-cytidyltransferase
TGME49_281400	48.0149	1.44479	8.64726e-05	0.00201472	phosphofructokinase domain-containing protein
TGME49_305140	72.554	0.743945	0.000984967	0.0121614	phospholipase, patatin family protein
TGME49_231370	24.8544	0.868923	0.00477595	0.0367748	phospholipase, patatin family protein
TGME49_245510	95.5318	0.686517	0.00103512	0.0126172	phospholipid-translocating P-type ATPase, flippase subfamily protein
TGME49_216380	33.8661	0.75204	0.000613388	0.00863217	phospholipid-translocating P-type ATPase, flippase subfamily protein
TGME49_222900	57.2728	0.976958	0.00155567	0.0169646	phosphoserine phosphatase
TGME49_310190	22.6802	1.03149	6.04165e-05	0.00151377	PIK3R4 kinase-related protein (incomplete catalytic triad)
TGME49_253750	85.289	1.51153	3.81733e-15	3.44323e-12	PLU-1 family protein
TGME49_271420	12.0696	1.60086	3.06278e-05	0.000860515	porphobilinogen deaminase
TGME49_215100	17.3767	0.941181	0.002751	0.0249023	PP-loop family protein
TGME49_231970	117.872	0.62511	0.000315532	0.00547326	pre-mRNA processing splicing factor PRP8
TGME49_225125	50.0589	1.07948	0.000212057	0.0041325	pre-rRNA processing protein
TGME49_275410	9.56771	1.05514	0.00153291	0.0168035	Proteasome/cyclosome repeat-containing protein
TGME49_238040	59.2405	0.637031	0.00218116	0.0211224	protein disulfide-isomerase domain-containing protein
TGME49_239420	174.309	0.498883	0.00183431	0.0187957	protein kinase
TGME49_272475	27.3274	0.772141	0.00410185	0.0329177	protein kinase domain-containing protein
TGME49_237860	15.3203	1.80151	0.000215708	0.00413737	protein kinase domain-containing protein
TGME49_311360	90.294	0.446794	0.00526924	0.0390952	protein kinase G AGC kinase family member PKG
TGME49_283790	59.7709	1.19138	1.17094e-07	8.49803e-06	protein kinase, putative
TGME49_246510	61.458	0.533181	0.00619298	0.0437263	protein phosphatase 2a regulatory b subunit (b56 family) protein
TGME49_232010	28.6866	0.904769	3.01038e-05	0.000856195	protein phosphatase 2C domain-containing protein
TGME49_260600	239.006	0.904946	5.41239e-06	0.00021226	Pumilio-family RNA binding repeat-containing protein
TGME49_318350	49.0135	1.78185	9.18529e-13	2.76171e-10	Pumilio-family RNA binding repeat-containing protein
TGME49_290960	37.1704	0.678205	0.000687141	0.0094523	pyruvate phosphate dikinase, pep/pyruvate binding domain-containing protein
TGME49_202240	9.52781	1.20724	0.00120516	0.0140915	RAP domain-containing protein
TGME49_211890	21.3153	1.34624	1.26448e-05	0.000426947	RAP domain-containing protein
TGME49_264820	24.4739	1.17893	2.95202e-07	1.80962e-05	RbAp48
TGME49_288700	15.1514	0.841353	0.00194676	0.0196042	RecF/RecN/SMC N terminal domain-containing protein
TGME49_306310	37.7683	0.845117	0.000485919	0.00735754	RecF/RecN/SMC N terminal domain-containing protein
TGME49_248640	62.8942	0.606015	0.00178645	0.0186133	regulator of chromosome condensation (RCC1) repeat-containing protein
TGME49_220300	32.3805	0.778997	0.00571053	0.0414917	ribosomal protein L15 protein
TGME49_309120	361.116	1.0708	0.00151275	0.0166693	ribosomal protein RPL4
TGME49_221580	57.4237	0.957498	6.10291e-05	0.00152307	ribosomal RNA large subunit methyltransferase J protein
TGME49_314875	34.3433	0.745893	0.000308396	0.00537904	RIC1 protein
TGME49_203540	104.343	0.979431	1.63781e-05	0.000522278	RNA binding protein, putative
TGME49_254950	12.4542	1.13257	5.20915e-05	0.00134247	RNA cap guanine-N2 methyltransferase
TGME49_291820	33.0129	0.825639	0.00436944	0.0345886	RNA helicase (UPF2 interacting domain) protein
TGME49_218580	14.4014	0.969771	0.00075065	0.010015	RNA methyltransferase, TrmH family protein
TGME49_316680	55.1747	0.844215	2.14979e-05	0.000649464	RNA pseudouridine synthase superfamily protein
TGME49_202640	9.56893	1.0791	0.00199462	0.0199272	RNA pseudouridine synthase superfamily protein
TGME49_306660	65.3349	1.59137	4.36331e-13	1.45e-10	RNA pseudouridine synthase superfamily protein
TGME49_304760	79.9525	0.793814	9.72611e-06	0.000349382	RNA recognition motif-containing protein
TGME49_268200	63.3055	0.899593	4.59784e-05	0.00121978	RNA recognition motif-containing protein
TGME49_270880	82.3042	0.906959	9.4743e-07	5.02695e-05	RNA recognition motif-containing protein
TGME49_320100	205.516	1.05502	1.25594e-05	0.000426947	RNA recognition motif-containing protein
TGME49_294710	13.308	1.12048	0.000156369	0.00318489	RNA recognition motif-containing protein
TGME49_265250	23.4263	1.28899	2.86349e-05	0.000820862	RNA recognition motif-containing protein
TGME49_268380	51.2592	1.29829	8.12723e-13	2.56577e-10	RNA recognition motif-containing protein
TGME49_217880	9.14937	1.41148	9.73887e-06	0.000349382	RNA-binding protein Nova-1, putative
TGME49_217182	78.8923	0.705872	0.000689817	0.00946849	RNA-dependent RNA polymerase RDP
TGME49_209650	18.6901	0.867792	0.000275499	0.00491385	RNA-directed DNA polymerase
TGME49_202720	7.57103	0.934871	0.00519358	0.0386701	RNB family domain-containing protein
TGME49_217790	8.5119	1.27372	0.000946964	0.0118634	S1 RNA binding domain-containing protein
TGME49_259990	53.1036	0.661597	0.000857139	0.0110224	SAC3/GANP family protein
TGME49_256830	40.9834	0.835513	7.74059e-05	0.00182366	SacI domain-containing protein
TGME49_207120	28.0323	0.716789	0.00508957	0.0382111	Sad1/UNC family protein
TGME49_264660	167.35	1.2804	0.0013807	0.0156232	SAG-related sequence SRS44
TGME49_202870	22.6913	0.691018	0.00662697	0.045981	SAP domain-containing protein
TGME49_226510	42.945	0.631287	0.00274239	0.0248785	Sec23/Sec24 trunk domain-containing protein
TGME49_228660	71.1632	0.749543	0.00125257	0.0145114	Sec7 domain-containing protein
TGME49_312300	61.8613	0.821599	0.00022361	0.00425263	Sec7 domain-containing protein
TGME49_266830	65.9726	0.932417	1.09326e-06	5.52226e-05	Sec7 domain-containing protein
TGME49_254490	21.9105	0.739267	0.00106329	0.0128122	Sel1 repeat-containing protein
TGME49_280560	42.1993	0.597289	0.003522	0.0299264	selenide, water dikinase
TGME49_290840	62.1816	0.635545	0.00206169	0.0204357	serine protease
TGME49_223985	51.2481	0.82576	0.000383686	0.00634187	serine/threonine specific protein phosphatase
TGME49_307040	43.6998	1.09235	6.79966e-05	0.00165127	shikimate dehydrogenase substrate binding domain-containing protein
TGME49_214090	67.5241	1.00443	4.44823e-05	0.00118918	signal peptidase
TGME49_201400	35.5261	0.720227	0.00225691	0.0215911	Sin3-associated polypeptide SAP18
TGME49_316730	60.8229	0.691259	0.000395669	0.00644591	Sma protein
TGME49_301350	7.04262	1.03515	0.00729065	0.0493389	SNARE associated protein
TGME49_208420	49.8717	1.04401	1.47259e-05	0.000474383	Sodium:neurotransmitter symporter family protein
TGME49_310130	12.8656	0.900536	0.00455389	0.0354541	Spc97 / Spc98 family protein
TGME49_209970	41.9324	0.937583	0.00237603	0.0224757	Spc97 / Spc98 family protein
TGME49_230960	73.2151	0.529128	0.0018471	0.0188107	splicing factor 3b, subunit 3, putative
TGME49_236660	23.7022	0.824354	0.000379037	0.00628148	START domain-containing protein
TGME49_225960	15.673	1.12177	3.05821e-05	0.000860515	STE kinase
TGME49_314500	100.894	0.552511	0.00333096	0.0287711	subtilisin SUB2
TGME49_212880	69.5614	1.05909	2.74794e-07	1.73505e-05	surface antigen repeat-containing protein
TGME49_278440	27.5484	0.741037	0.000970365	0.0121324	SWI2/SNF2 Brahma-like putative
TGME49_320300	68.2065	0.865737	0.000269368	0.0048181	SWI2/SNF2 Brahma-like putative
TGME49_280800	48.6455	0.739301	0.00412085	0.0329778	SWI2/SNF2 SRCAP/Ino80
TGME49_236970	181.437	0.707629	6.5721e-05	0.00160795	SWI2/SNF2-containing PHD finger protein
TGME49_229460	25.2328	0.78695	0.00146122	0.0163584	SWI2/SNF2-containing protein
TGME49_245720	40.363	0.941238	0.000603607	0.00854959	SWI2/SNF2-containing protein
TGME49_273780	14.535	1.1413	0.000150474	0.00310489	SWI2/SNF2-containing protein
TGME49_316430	22.4327	1.2221	0.000324768	0.00558742	target of rapamycin (TOR), putative
TGME49_216430	94.6164	0.863306	1.74925e-07	1.16261e-05	TBC domain-containing protein
TGME49_262700	13.3042	0.834682	0.00516171	0.0385237	tetratricopeptide repeat-containing protein
TGME49_214580	18.0825	0.844608	0.00676618	0.0464871	tetratricopeptide repeat-containing protein
TGME49_260150	8.25917	1.19545	0.00481756	0.03696	tetratricopeptide repeat-containing protein
TGME49_251410	34.1695	1.25034	3.87939e-06	0.000166629	tetratricopeptide repeat-containing protein
TGME49_211370	3.60397	2.14522	0.00254706	0.0236154	tetratricopeptide repeat-containing protein
TGME49_228750	27.3571	1.34643	7.91905e-08	6.14212e-06	TGME49_228750 CAM kinase, RAD family
TGME49_314890	16.7553	0.947785	0.0042824	0.0339687	ThiF family protein
TGME49_237280	49.0258	0.888262	6.69973e-07	3.71071e-05	TLD protein
TGME49_264225	2.80735	1.79338	0.00388278	0.0318802	Toxoplasma gondii family B protein
TGME49_228780	27.3336	0.705521	0.00681436	0.0466829	Toxoplasma gondii family C protein
TGME49_300990	64.8125	0.87629	0.000742301	0.00995094	Toxoplasma gondii family C protein
TGME49_220080	7.12895	1.14275	0.00737363	0.0496874	Toxoplasma gondii family C protein
TGME49_308890	63.4319	0.743177	1.26188e-05	0.000426947	transcription elongation factor SPT6
TGME49_227430	40.0207	0.883238	0.00127967	0.0146639	transmembrane amino acid transporter protein
TGME49_267720	82.7894	0.655335	0.000115076	0.00251416	transporter, cation channel family protein
TGME49_311080	43.4628	0.842255	0.000240316	0.00446281	transporter, cation channel family protein
TGME49_263260	135.489	0.819876	0.00570263	0.0414917	transporter, major facilitator family protein
TGME49_234410	39.2304	0.681588	0.00147186	0.0164069	transporter, small conductance mechanosensitive ion channel (MscS) family protein
TGME49_294820	12.4538	0.865148	0.0028141	0.0253108	type I fatty acid synthase, putative
TGME49_234970	27.4991	0.861683	9.54148e-05	0.00217491	Tyrosine kinase-like (TKL) protein
TGME49_253860	71.2475	1.38414	7.39941e-14	4.24726e-11	Tyrosine kinase-like (TKL) protein
TGME49_205010	57.1201	0.706014	4.65945e-05	0.00122582	U2 small nuclear ribonucleoprotein family protein, putative
TGME49_314840	27.6054	0.640682	0.00321956	0.0279619	ubiquitin carboxyl-terminal hydrolase
TGME49_223450	43.3501	1.10355	1.72268e-05	0.00054385	ubiquitin carboxyl-terminal hydrolase
TGME49_255180	29.5268	1.20536	0.000108022	0.00240158	ubiquitin carboxyl-terminal hydrolase
TGME49_210781	39.3753	1.50861	1.9679e-08	1.82726e-06	ubiquitin carboxyl-terminal hydrolase
TGME49_289330	81.4356	0.987091	1.31724e-09	1.84823e-07	ubiquitin carboxyl-terminal hydrolase family 2 protein
TGME49_251510	15.7093	0.868774	0.0027529	0.0249023	Ulp1 protease family, C-terminal catalytic domain-containing protein
TGME49_290720	84.2468	0.561705	0.000625447	0.00875626	vacuolar proton translocating ATPase subunit, putative
TGME49_253290	115.744	0.461579	0.00540338	0.0399028	valyl-tRNA synthetase
TGME49_295330	21.3362	0.922482	0.000487668	0.00736102	Vps54 family protein
TGME49_247790	30.1306	0.640753	0.00352944	0.0299264	VRR-NUC domain-containing protein
TGME49_311400	114.736	0.681841	3.42086e-05	0.000943202	WD domain, G-beta repeat-containing protein
TGME49_209520	24.8107	0.723189	0.00375996	0.0312374	WD domain, G-beta repeat-containing protein
TGME49_239590	39.2181	0.803896	0.00157661	0.0170749	WD domain, G-beta repeat-containing protein
TGME49_315140	23.4494	0.823206	0.00288178	0.0257363	WD domain, G-beta repeat-containing protein
TGME49_310910	13.7668	0.846607	0.00154718	0.0169144	WD domain, G-beta repeat-containing protein
TGME49_268250	18.7358	0.859655	0.000981194	0.0121614	WD domain, G-beta repeat-containing protein
TGME49_248290	33.4136	0.932181	0.000216055	0.00413737	WD domain, G-beta repeat-containing protein
TGME49_272040	6.36928	1.05355	0.00308685	0.026995	WD domain, G-beta repeat-containing protein
TGME49_213060	35.142	1.07468	2.32804e-05	0.000693361	WD domain, G-beta repeat-containing protein
TGME49_273800	21.4643	1.13245	1.16889e-06	5.81134e-05	WD domain, G-beta repeat-containing protein
TGME49_310410	9.3328	1.38995	0.0011348	0.0135667	WD domain, G-beta repeat-containing protein
TGME49_251670	15.4343	0.920052	0.00193415	0.019527	werner helicase interacting protein 1, putative
TGME49_242830	24.7584	0.737879	0.00160662	0.0172815	XRN 5'-3' exonuclease N-terminus protein
TGME49_316480	26.3159	0.920354	0.000524697	0.00779515	XRN 5'-3' exonuclease N-terminus protein
TGME49_294010	20.9208	1.00758	0.00166093	0.0176254	yrdC domain-containing protein
TGME49_219120	98.5197	0.64678	0.00169074	0.0178517	zinc finger (CCCH type) motif-containing protein
TGME49_218300	93.1959	0.662639	0.00058762	0.00842767	zinc finger (CCCH type) motif-containing protein
TGME49_213660	369.479	0.699636	0.000498838	0.00745215	zinc finger (CCCH type) motif-containing protein
TGME49_248270	61.7696	0.824154	0.00120067	0.014065	zinc finger (CCCH type) motif-containing protein
TGME49_246200	22.4443	1.00082	0.000452305	0.00699964	zinc finger (CCCH type) motif-containing protein
TGME49_256820	7.65578	1.00656	0.00446684	0.0351229	zinc finger (CCCH type) motif-containing protein
TGME49_255310	35.7231	1.21822	3.55838e-06	0.000153888	zinc finger (CCCH type) motif-containing protein
TGME49_253790	46.2029	1.56256	2.19053e-09	2.88146e-07	zinc finger (CCCH type) motif-containing protein
TGME49_295658	32.3879	1.10933	9.95138e-07	5.15292e-05	zinc finger in N-recognin protein
TGME49_203320	51.1036	1.2742	7.5411e-12	1.7635e-09	zinc finger in N-recognin protein
TGME49_278800	72.8567	0.509849	0.00599348	0.0429175	zinc finger protein 36 family 3 protein
TGME49_313870	17.2097	0.949784	0.00117063	0.0138415	zinc finger, C3HC4 type (RING finger) domain-containing protein
TGME49_223880	44.6283	1.17778	9.85376e-07	5.15292e-05	zinc finger, C3HC4 type (RING finger) domain-containing protein
TGME49_264860	18.8313	1.28828	2.87315e-05	0.000820862	zinc finger, C3HC4 type (RING finger) domain-containing protein
TGME49_278240	6.18494	1.76232	0.000199927	0.00393251	Zn-finger in Ran binding protein and others domain-containing protein
TGME49_250780	21.5695	0.749643	0.00211744	0.0207279	Zn-finger in ubiquitin-hydrolases domain-containing protein
